# Supplementary material for: A Highly Sensitive Next-Generation Sequencing-Based Genotyping Platform for EGFR Mutations in Plasma from Non-Small Cell Lung Cancer Patients
Source: MDPI journal article supplement (doi:10.3390/cancers12123579), 2020-11-30
Supplement: s1 [file s1]

# A Highly Sensitive Next-Generation Sequencing-Based Genotyping Platform for *EGFR* Mutations in Plasma from Non-Small Cell Lung Cancer Patients

Jung-Young Shin, Jeong-Oh Kim, Mi-Ran Lee, Seo Ree Kim, Kyongmin Sarah Beck and Jin Hyoung Kang

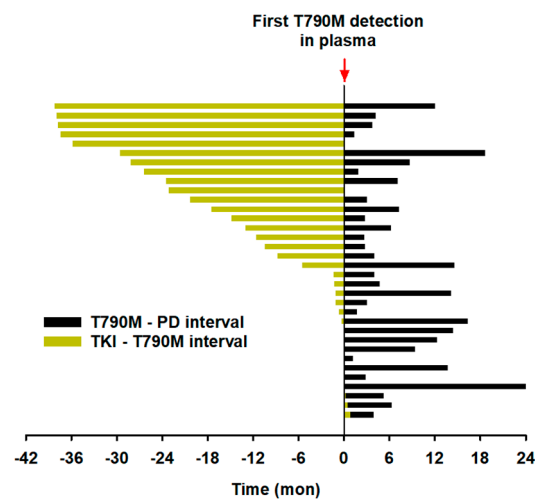

**Figure S1.** Timeline plots showing intervals between EGFR-TKI initiation and first T790M detection (yellow color), and intervals between first T790M detection and disease progression (black color) in patients (n = 34) who developed drug resistance to first-line EGFR-TKI treatments.

**Table S1.** Diagnostic performance of Sel-Cap and NGS tumor biopsies for two *EGFR* activating mutations in NSCLC patients (n = 61), with paired PNAclamp tumor biopsy as the reference.

|             |          | Ex19del |                 |       |        |                 |       | L858R   |                 |       |        |                 |       |
|-------------|----------|---------|-----------------|-------|--------|-----------------|-------|---------|-----------------|-------|--------|-----------------|-------|
|             |          | Sel-Cap |                 |       | NGS    |                 |       | Sel-Cap |                 |       | NGS    |                 |       |
|             |          | Mutant  | Wild            | Total | Mutant | Wild            | Total | Mutant  | Wild            | Total | Mutant | Wild            | Total |
| PNAclamp    | Mutant   | 20      | 0               | 20    | 18     | 2               | 20    | 16      | 1               | 17    | 16     | 1               | 17    |
|             | Wild     | 0       | 41              | 41    | 0      | 41              | 41    | 0       | 44              | 44    | 0      | 44              | 44    |
|             | Total    | 20      | 41              | 61    | 18     | 43              | 61    | 16      | 45              | 61    | 16     | 45              | 61    |
| Sensitivity | (95% CI) | 100%    | ( 84% - 100% )  |       | 90%    | ( 70% - 97% )   |       | 94%     | ( 73% - 99% )   |       | 94%    | ( 73% - 99% )   |       |
| Specificity | (95% CI) | 100%    | ( 91% - 100% )  |       | 100%   | ( 91% - 100% )  |       | 100%    | ( 92% - 100% )  |       | 100%   | ( 92% - 100% )  |       |
| Accuracy    | (95% CI) | 100%    | ( 94% - 100% )  |       | 97%    | ( 89% - 99% )   |       | 98%     | ( 91% - 100% )  |       | 98%    | ( 91% - 100% )  |       |
| Kappa       | (95% CI) | 1.00    | ( 1.00 - 1.00 ) |       | 0.92   | ( 0.82 - 1.03 ) |       | 0.96    | ( 0.88 - 1.04 ) |       | 0.96   | ( 0.88 - 1.04 ) |       |

**Table S2.** Clinical characteristics of patients included in the retrospective longitudinal monitoring study (n = 34).

| No. | T90M Detection Group | Sex | Age | Stage at TKI | Previous Chemo | EGFR-TKI  | Companion Mutation | T790M Detected at # Sampling | Interval TKI - T790M (mon) | Interval T790M - PD (mon) | PFS  |
|-----|----------------------|-----|-----|--------------|----------------|-----------|--------------------|------------------------------|----------------------------|---------------------------|------|
| 1   | Early                | F   | 63  | IV           | N              | afatinib  | L858R              | 1st                          | -0.8                       | 3.9                       | 3.1  |
| 2   | Early                | M   | 77  | IV           | N              | erlotinib | Ex19del            | 1st                          | -0.5                       | 6.3                       | 5.9  |
| 3   | Early                | M   | 61  | IV           | N              | afatinib  | Ex19del            | 1st                          | -0.2                       | 5.2                       | 4.9  |
| 4   | Early                | F   | 67  | IV           | unknown        | afatinib  | L858R              | 1st                          | -0.1                       | 24.2                      | 24.1 |
| 5   | Early                | F   | 81  | IIIA         | N              | gefitinib | L858R              | 1st                          | -0.1                       | 2.9                       | 2.8  |
| 6   | Early                | F   | 75  | IV           | N              | gefitinib | Ex19del            | 1st                          | 0.0                        | 13.7                      | 13.7 |
| 7   | Early                | M   | 54  | IV           | Y              | afatinib  | Ex19del            | 1st                          | 0.0                        | 1.2                       | 1.2  |
| 8   | Early                | M   | 50  | IV           | N              | gefitinib | Ex19del            | 1st                          | 0.0                        | 9.4                       | 9.4  |
| 9   | Early                | M   | 80  | IV           | unknown        | erlotinib | Ex19del            | 1st                          | 0.0                        | 12.3                      | 12.3 |
| 10  | Early                | M   | 65  | IIIB         | N              | afatinib  | L858R              | 1st                          | 0.0                        | 14.4                      | 14.4 |
| 11  | Early                | F   | 64  | IV           | N              | afatinib  | Ex19del            | 1st                          | 0.3                        | 16.3                      | 16.6 |
| 12  | Early                | F   | 77  | IIIA         | unknown        | erlotinib | L858R              | 1st                          | 0.7                        | 1.7                       | 2.4  |
| 13  | Early                | F   | 57  | IV           | N              | erlotinib | L858R              | 1st                          | 1.1                        | 3.0                       | 4.1  |
| 14  | Early                | M   | 59  | IV           | N              | afatinib  | Ex19del            | 1st                          | 1.1                        | 14.1                      | 15.2 |

| 15  | Early                | F   | 72  | IV           | N              | gefitinib | Ex19del            | 1st                          | 1.3                        | 4.7                       | 6.0  |
|-----|----------------------|-----|-----|--------------|----------------|-----------|--------------------|------------------------------|----------------------------|---------------------------|------|
| 16  | Early                | M   | 56  | IIB          | Y              | afatinib  | None               | 1st                          | 1.4                        | 4.0                       | 5.5  |
| No. | T90M Detection Group | Sex | Age | Stage at TKI | Previous Chemo | EGFR-TKI  | Companion Mutation | T790M Detected at # Sampling | Interval TKI - T790M (mon) | Interval T790M - PD (mon) | PFS  |
| 17  | Late                 | F   | 39  | IV           | N              | afatinib  | Ex19del            | 2nd                          | 5.5                        | 14.6                      | 20.1 |
| 18  | Late                 | F   | 43  | IV           | N              | gefitinib | L858R              | 2nd                          | 8.8                        | 4.0                       | 12.8 |
| 19  | Late                 | F   | 73  | IV           | N              | gefitinib | Ex19del            | 2nd                          | 10.5                       | 2.8                       | 13.3 |
| 20  | Late                 | M   | 64  | IV           | N              | afatinib  | Ex19del            | 4th                          | 11.6                       | 2.7                       | 14.3 |
| 21  | Late                 | F   | 68  | IV           | Y              | erlotinib | None               | 4th                          | 13.0                       | 6.2                       | 19.2 |
| 22  | Late                 | M   | 48  | IV           | N              | gefitinib | Ex19del            | 3rd                          | 14.9                       | 2.8                       | 17.7 |
| 23  | Late                 | F   | 51  | IIB          | N              | erlotinib | L858R              | 5th                          | 17.5                       | 7.3                       | 24.8 |
| 24  | Late                 | M   | 75  | IV           | N              | erlotinib | Ex19del            | 3rd                          | 20.3                       | 3.0                       | 23.3 |
| 25  | Late                 | M   | 61  | IV           | N              | gefitinib | L858R              | 5th                          | 23.2                       | 0.0                       | 23.2 |
| 26  | Late                 | M   | 66  | IV           | N              | gefitinib | Ex19del            | 4th                          | 23.5                       | 7.1                       | 30.5 |
| 27  | Late                 | F   | 53  | IV           | N              | erlotinib | Ex19del            | 3rd                          | 26.4                       | 1.9                       | 28.3 |
| 28  | Late                 | F   | 69  | IV           | Y              | erlotinib | None               | 6th                          | 28.2                       | 8.7                       | 36.8 |
| 29  | Late                 | M   | 71  | IIIA         | Y              | erlotinib | Ex19del            | 4th                          | 29.6                       | 18.6                      | 48.2 |
| 30  | Late                 | M   | 50  | IIB          | Y              | erlotinib | L858R              | 4th                          | 35.8                       | 0.0                       | 35.8 |
| 31  | Late                 | F   | 61  | IIIA         | N              | erlotinib | Ex19del            | 4th                          | 37.4                       | 1.4                       | 38.8 |
| 32  | Late                 | F   | 69  | IIIA         | N              | erlotinib | None               | 4th                          | 37.8                       | 3.7                       | 41.5 |
| 33  | Late                 | F   | 46  | IIB          | N              | gefitinib | Ex19del            | 5th                          | 38.0                       | 4.2                       | 42.2 |
| 34  | Late                 | F   | 74  | IV           | N              | erlotinib | L858R              | 4th                          | 38.2                       | 12.0                      | 50.2 |

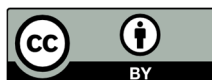

© 2020 by the authors. Licensee MDPI, Basel, Switzerland. This article is an open access article distributed under the terms and conditions of the Creative Commons Attribution (CC BY) license (<http://creativecommons.org/licenses/by/4.0/>).
